# Supplementary material
Source: PubMed Central journal article supplement (PMC4937731)
Supplement: ajcr0006-1253-f8.pdf [file ajcr0006-1253-f8.pdf]

## The role of CASZ1 in ovarian cancer

**Supplementary Table 1.** Top 10 up-and down-regulated genes and other metastasis-related genes in MCAS cells with sh-CASZ1 (2) and sh-CASZ1 (3), compared to that in sh-luc cells by the analysis of microarray data

| Gene symbol     | Accession No.  | Gene description                                                 | Log2 fold-change (sh-CASZ1 (2)/sh-luc) | Log2 fold-change (sh-CASZ1 (3)/sh-luc) |
|-----------------|----------------|------------------------------------------------------------------|----------------------------------------|----------------------------------------|
| <i>IL8</i>      | NM_000584.2    | Homo sapiens interleukin 8                                       | -2.97                                  | -2.84                                  |
| <i>SERPINA3</i> | NM_001085.4    | Homo sapiens serpin peptidase inhibitor, clade A, member 3       | -2.32                                  | -2.19                                  |
| <i>GDF15</i>    | NM_004864.1    | Homo sapiens growth differentiation factor 15                    | -2.22                                  | -2.39                                  |
| <i>CXCL2</i>    | NM_002089.3    | Homo sapiens chemokine (C-X-C motif) ligand 2                    | -2.12                                  | -2.10                                  |
| <i>SAA1</i>     | NM_000331.3    | Homo sapiens serum amyloid A1                                    | -2.10                                  | -1.98                                  |
| <i>CXCL1</i>    | NM_001511.1    | Homo sapiens chemokine (C-X-C motif) ligand 1                    | -2.10                                  | -2.13                                  |
| <i>C15ORF48</i> | NM_032413.2    | Homo sapiens chromosome 15 open reading frame 48                 | -2.05                                  | -2.12                                  |
| <i>FST</i>      | NM_006350.2    | Homo sapiens follistatin                                         | -1.92                                  | -1.96                                  |
| <i>PHGDH</i>    | NM_006623.2    | Homo sapiens phosphoglycerate dehydrogenase                      | -1.85                                  | -1.76                                  |
| <i>RARRES3</i>  | NM_004585.3    | Homo sapiens retinoic acid receptor responder 3                  | -1.84                                  | -1.78                                  |
| <i>CCL20</i>    | NM_004591.1    | Homo sapiens chemokine (C-C motif) ligand 20                     | -1.76                                  | -1.82                                  |
| <i>TNF</i>      | NM_000594.2    | Homo sapiens tumor necrosis factor                               | -1.24                                  | -1.33                                  |
| <i>MMP7</i>     | NM_002423.3    | Homo sapiens matrix metalloproteinase 7                          | -1.05                                  | -1.05                                  |
| <i>SAA4</i>     | NM_006512.1    | Homo sapiens serum amyloid A4                                    | -0.78                                  | -0.82                                  |
| <i>IL6</i>      | NM_000600.1    | Homo sapiens interleukin 6                                       | -0.72                                  | -0.80                                  |
| <i>S100A4</i>   | NM_019554.2    | Homo sapiens S100 calcium binding protein A4                     | -0.68                                  | -0.74                                  |
| <i>SAA2</i>     | NM_030754.2    | Homo sapiens serum amyloid A2                                    | -0.62                                  | -0.59                                  |
| <i>DHRS9</i>    | NM_005771.3    | Homo sapiens dehydrogenase/reductase member 9                    | 1.41                                   | 1.41                                   |
| <i>SNAPC4</i>   | NM_003086.2    | Homo sapiens small nuclear RNA activating complex, polypeptide 4 | 1.43                                   | 1.49                                   |
| <i>INTS1</i>    | NM_001080453.1 | Homo sapiens integrator complex subunit 1                        | 1.45                                   | 1.11                                   |
| <i>NTSR1</i>    | NM_002531.2    | Homo sapiens neurotensin receptor 1                              | 1.49                                   | 1.48                                   |
| <i>IL1RL1</i>   | NM_016232.4    | Homo sapiens interleukin 1 receptor-like 1                       | 1.60                                   | 1.53                                   |
| <i>TXNIP</i>    | NM_006472.2    | Homo sapiens thioredoxin interacting protein                     | 1.63                                   | 1.65                                   |
| <i>ZDHHC11</i>  | NM_024786.1    | Homo sapiens zinc finger, DHHC-type containing 11                | 1.75                                   | 1.66                                   |
| <i>HAS3</i>     | NM_005329.2    | Homo sapiens hyaluronan synthase 3                               | 1.80                                   | 1.72                                   |
| <i>KRT6A</i>    | NM_005554.3    | Homo sapiens keratin 6A                                          | 1.89                                   | 1.92                                   |
| <i>MMP1</i>     | NM_002421.2    | Homo sapiens matrix metalloproteinase 1                          | 2.03                                   | 2.13                                   |

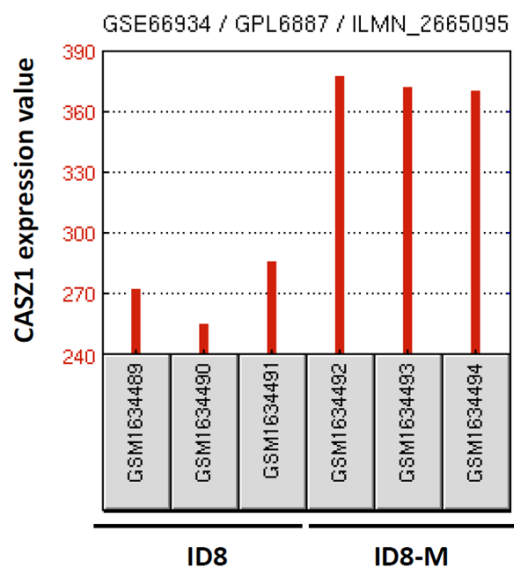

**Supplementary Figure 1.** CASZ1 expression is higher in mouse ovarian cancer cells with accelerated metastatic phenotype. CASZ1 expression is analyzed in a GEO dataset, GSE66934. ID8-M cells is *in vivo* selected from ascites in mice intraperitoneally injected parental ID8 cells, a mouse ovarian epithelial papillary serous adenocarcinoma cell line. ID8-M exhibits a rapid metastatic phenotype.

The role of CASZ1 in ovarian cancer

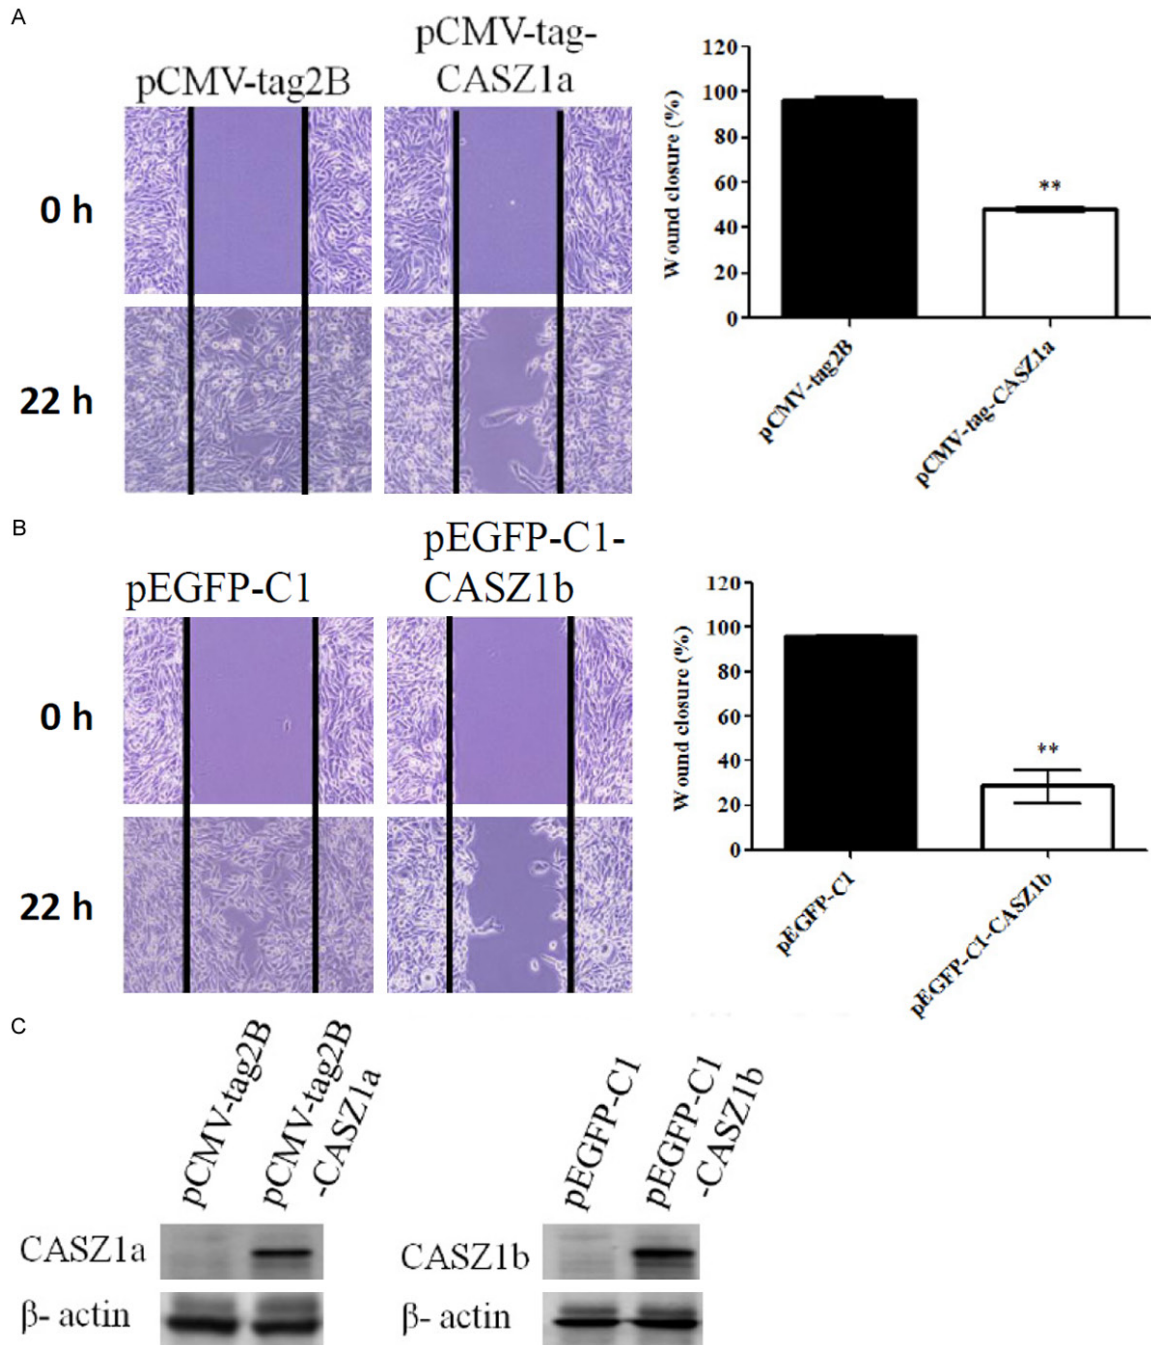

**Supplementary Figure 2.** Overexpression of CASZ1 inhibits the migration abilities in SH-SY5Y cells. SH-SY5Y cells were transfected with pCMV-tag2B vector or pCMA-tag-CASZ1a (A), and pEGFP-C1 vector or pEGFP-C1-CASZ1b (B). The migration ability was examined by wound healing assay. Error bars represent SEM. \*\*,  $P < 0.005$  by Student's t-test. (C) The expression of CASZ1a or CASZ1b in CASZ1-overexpressed SH-SY5Y cells was analyzed by immunoblotting.  $\beta$ -actin was used as the internal control.

### The role of CASZ1 in ovarian cancer

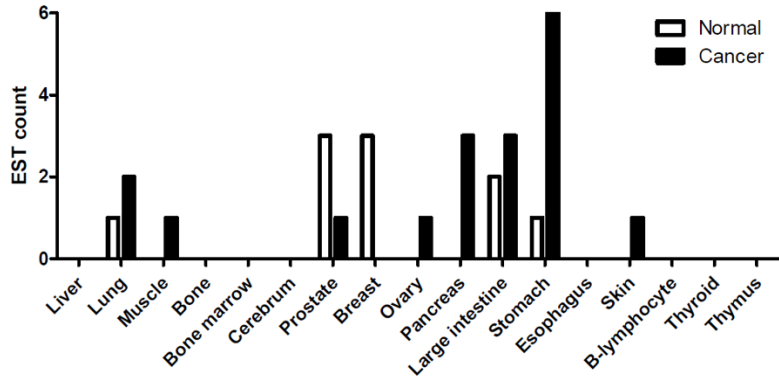

**Supplementary Figure 3.** CASZ1 is highly expressed in ovarian cancer tissues analyzed by *in silico* data mining. The EST expression analysis of the CASZ1 gene in different normal and cancerous tissues was modified from the ECgene database (<http://genome.ewha.ac.kr/ECgene/>).

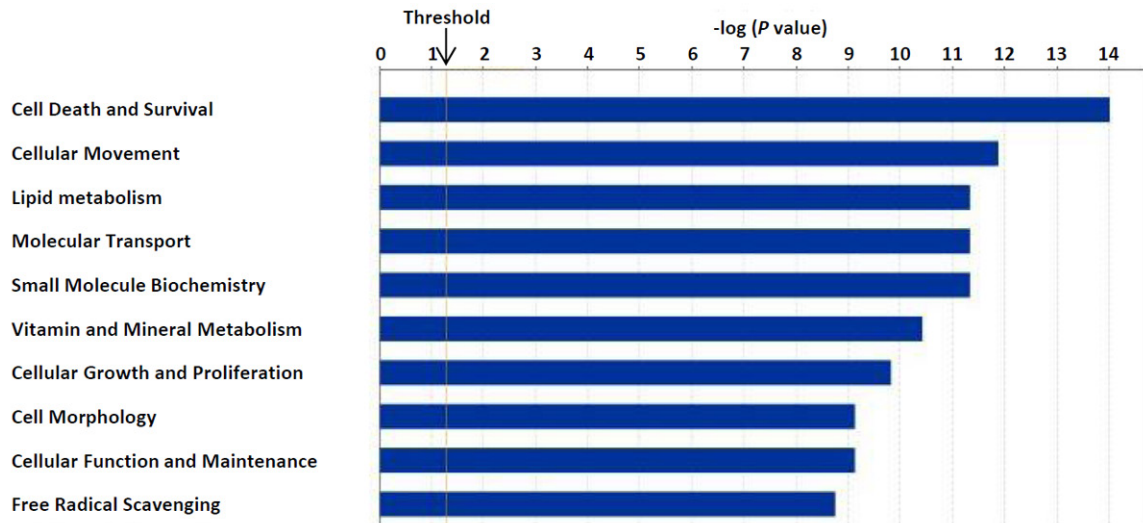

**Supplementary Figure 4.** Ingenuity Pathways Analysis (IPA) for microarray data of MCAS cells with sh-luc, sh-CASZ1 (2), and sh-CASZ1 (3).
